# Supplementary material for: Cyclic di-GMP mediates a histidine kinase/phosphatase switch by noncovalent domain cross-linking
Source: PubMed Central journal article supplement — Sci Adv. 2016 Sep 16;2(9):e1600823. doi: 10.1126/sciadv.1600823 (PMC5026420; doi:10.1126/sciadv.1600823), 2016-09-16
Supplement: 1600823_SM.pdf [file 1600823_SM.pdf]

## Supplementary Materials for **Cyclic di-GMP mediates a histidine kinase/phosphatase switch by noncovalent domain cross-linking**

Badri N. Dubey, Christian Lori, Shogo Ozaki, Geoffrey Fucile, Ivan Plaza-Menacho, Urs Jenal,  
Tilman Schirmer

Published 16 September 2016, *Sci. Adv.* **2**, e1600823 (2016)  
DOI: 10.1126/sciadv.1600823

### **The PDF file includes:**

- table S1. Data collection and refinement statistics.
- table S2. Thermodynamic parameters of CckA-ligand interactions as measured by ITC.
- table S3. Kinetic parameters of HK/phosphatase CckA $\Delta$ TM.
- fig. S1. CckA crystal packings.
- fig. S2. Detailed views of domain interface of CckA $\Delta$ HP-CA and comparison with c-di-GMP-bound CckA $\Delta$ CA.
- fig. S3. Sequence alignment between CckA orthologs and paralogs.
- fig. S4. ITC ligand-binding profiles for several CckA.
- fig. S5. Structure prediction for PAS2 domain of CckA.
- fig. S6. Proposed model of noncovalent c-di-GMP-mediated cross-linking of the CA with the DHP domain of CckA.
- fig. S7. Consensus tree analysis for CckA orthologs and paralogs.
- fig. S8. Residue conservation in CckA orthologs and paralogs.
- References (45–51)

### **Other Supplementary Material for this manuscript includes the following:**

(available at [advances.sciencemag.org/cgi/content/full/2/9/e1600823/DC1](http://advances.sciencemag.org/cgi/content/full/2/9/e1600823/DC1))

- database S1 (Microsoft Excel format). Bacterial strains used in this study.
- database S2 (Microsoft Excel format). Plasmids used in this study.
- database S3 (Microsoft Excel format). Oligonucleotides used in this study.

**table S1. Data collection and refinement statics.**

|                                          | <b>CckA_CA/AMPPNP/<br/>c-di-GMP/Mg<sup>2+</sup></b> | <b>CckA_DHp-CA/ADP/Mg<sup>2+</sup></b> |
|------------------------------------------|-----------------------------------------------------|----------------------------------------|
| <b>Data collection</b>                   |                                                     |                                        |
| Synchrotron source                       | SLS, PXIII                                          | SLS, PXI                               |
| Space group                              | P 2 <sub>1</sub> 2 <sub>1</sub> 2 <sub>1</sub>      | P 6 <sub>3</sub> 2 2                   |
| a, b, c (Å)                              | 56.3, 62.1, 103.9                                   | 164.9, 164.9, 48.0                     |
| α, β, γ (°)                              | 90, 90, 90                                          | 90, 90, 120                            |
| Resolution (Å)                           | 30-1.9 (2.0-1.9)*                                   | 30-3.0 (3.1-3.0)                       |
| Unique reflections                       | 29150 (4197)                                        | 7413 (575)                             |
| Completeness                             | 99.2 (99.3)                                         | 91.4 (51.2)                            |
| I/σ(I)                                   | 13.8 (5.9)                                          | 15.0 (1.7)                             |
| Redundancy                               | 6.4 (6.5)                                           | 11.3 (1.6)                             |
| R <sub>merge</sub> (%)                   | 8.8 (30.0)                                          | 10.3 (32.7)                            |
| R <sub>pim</sub> (%)                     | 3.8 (16.3)                                          | 3.1 (28.6)                             |
| CC (1/2) %                               | 99.8 (91.9)                                         | 99.9 (77.4)                            |
| <b>Refinement</b>                        |                                                     |                                        |
| R <sub>work</sub> /R <sub>free</sub> (%) | 18.7/22.5                                           | 21.1/27.8                              |
| <b>rmsd</b>                              |                                                     |                                        |
| Bond length (Å)                          | 0.009                                               | 0.011                                  |
| Bond angles (°)                          | 1.62                                                | 1.65                                   |
| Molecules/asymmetric unit                | 2                                                   | 1                                      |
| <b>No. of atoms</b>                      |                                                     |                                        |
| Protein                                  | 2735                                                | 1869                                   |
| Ligand                                   | 110                                                 | 28                                     |
| Metals                                   | 2                                                   | 1                                      |
| Water                                    | 428                                                 | 1                                      |
| <b>Average B-factor (Å<sup>2</sup>)</b>  |                                                     |                                        |
| Protein                                  | 17.6                                                | 90                                     |
| Nucleotides                              | 16.9                                                | 90.3                                   |
| Metals                                   | 8                                                   | 74.1                                   |
| Water                                    | 10.1                                                | 63.5                                   |
|                                          | 24.6                                                | 61.3                                   |
| <b>Ramachandran statistics (%)</b>       |                                                     |                                        |
| Favored regions                          | 97.1                                                | 87.9                                   |
| Allowed regions                          | 2.6                                                 | 9.2                                    |
| Disallowed regions                       | 0.3                                                 | 2.9                                    |
| <b>PDB codes</b>                         | 5IDM                                                | 5IDJ                                   |

\* The values recorded in parentheses are those for the highest resolution shell

table S2. Thermodynamic parameters of CckA-ligand interactions as measured by ITC.

| (a) ADP binding* |                        |                           |                     |               |                 |                     |               |                 |
|------------------|------------------------|---------------------------|---------------------|---------------|-----------------|---------------------|---------------|-----------------|
| CckA construct   | C <sub>cell</sub> (μM) | C <sub>syringe</sub> (μM) | - c-di-GMP          |               |                 | + 100 μM c-di-GMP†) |               |                 |
|                  |                        |                           | K <sub>d</sub> (mM) | ΔH (kcal/mol) | -TΔS (kcal/mol) | K <sub>d</sub> (μM) | ΔH (kcal/mol) | -TΔS (kcal/mol) |
| CA               | 76                     | 5000                      | 1                   | -4.8          | 0.8             |                     | Nd            |                 |
| ΔTM              | 50                     | 5000                      | 0.53                | -1.6          | -2.9            | ‡                   | ~ 0.3         |                 |
| ΔTM G318A        | 50                     | 5000                      | 0.20                | -4.9          | -4.5            |                     | Nd            |                 |
| ΔTM R374A        | 50                     | 5000                      | 0.36                | -2.2          | -2.5            |                     | Nd            |                 |

| (b) AMPPNP binding |                        |                           |                        |               |                 |                     |               |                 |
|--------------------|------------------------|---------------------------|------------------------|---------------|-----------------|---------------------|---------------|-----------------|
| CckA construct     | C <sub>cell</sub> (μM) | C <sub>syringe</sub> (μM) | - c-di-GMP             |               |                 | + 100 μM c-di-GMP   |               |                 |
|                    |                        |                           | K <sub>d</sub> (μM)    | ΔH (kcal/mol) | -TΔS (kcal/mol) | K <sub>d</sub> (μM) | ΔH (kcal/mol) | -TΔS (kcal/mol) |
| CA                 | 20                     | 800                       | 12                     | -1.9          | -4.5            | 43                  | -2.4          | -3.3            |
| ΔTM                | 20                     | 800                       | 9.7                    | -1.4          | -5.2            | 57                  | -2.5          | -3              |
| ΔTM G318A          | 40                     | 1000                      | 25.0                   | -4.9          | -1.2            |                     | Nd            |                 |
| ΔTM R374A          | 40                     | 600                       | no significant binding |               |                 |                     | Nd            |                 |

| (c) c-di-GMP binding |                        |                           |                     |               |                 |                        |               |                 |
|----------------------|------------------------|---------------------------|---------------------|---------------|-----------------|------------------------|---------------|-----------------|
| CckA construct       | C <sub>cell</sub> (μM) | C <sub>syringe</sub> (μM) | + 5 mM ADP          |               |                 | + 5 mM AMPPNP          |               |                 |
|                      |                        |                           | K <sub>d</sub> (μM) | ΔH (kcal/mol) | -TΔS (kcal/mol) | K <sub>d</sub> (μM)    | ΔH (kcal/mol) | -TΔS (kcal/mol) |
| CA                   | 20/44                  | 400/600                   | 22                  | 2.2           | -8.3            | 25                     | 2             | -8              |
| DHp-CA               | 45/40                  | 700/800                   | 34                  | 0.9           | -6.7            | 33                     | 1             | -6.9            |
| ΔTM                  | 20                     | 400/800                   | 1.4                 | 4.9           | -12.5           | No significant binding |               |                 |
| ΔTM G318A            | 50                     | 800                       | 34                  | 0.9           | -6.7            | Weak binding           |               |                 |
| ΔTM R374A            | 50                     | 800                       | 25                  | 1             | -7              | 48                     | 0.7           | -6.3            |

Raw data and fits to the data are shown in fig. S4. The data were measured at 25°C (ADP) or 12°C (AMPPNP, c-di-GMP). The cell volume was 1.4 ml, the syringe volume 300 μL.

\* Heat of ADP dilution has been subtracted from the data.

† Note that at the employed concentration, the protein is not saturated with c-di-GMP at the start of titration. Thus, upon titration, a contribution to the generated heat by c-di-GMP binding or unbinding should be considered. Furthermore, the problem is compounded by the distinct sign of the two ΔH contributions (endo- and exothermic binding of c-di-GMP and mono-nucleotide, respectively). Therefore, the given values have to be considered as effective parameters only.

‡ No reliable fit due to very low signal.

**table S3. Kinetic parameters of HK/phosphatase CckA\_ΔTM.**

| <b>Rate and dissociation constants</b>      | <b>Value</b>                       |
|---------------------------------------------|------------------------------------|
| auto-phosphorylation rate ( $k_1$ )         | $2.6 \cdot 10^{-3} \text{ s}^{-1}$ |
| auto-dephosphorylation rate ( $k_2$ )       | $2.1 \cdot 10^{-2} \text{ s}^{-1}$ |
| ATP binding off-rate ( $k_{r1}$ )           | $0.46 \text{ s}^{-1}$              |
| ADP binding off-rate ( $k_{r2}$ )           | $7.0 \cdot 10^{-3} \text{ s}^{-1}$ |
| CckA/ATP affinity ( $K_{d1}$ )              | $9.7 \text{ } \mu\text{M}$ *       |
| CckA/ADP affinity, - c-di-GMP ( $K_{d2}$ )  | $0.53 \text{ mM}$ *                |
| CckA/ADP affinity, + c-di-GMP ( $K_{d2'}$ ) | $0.3 \text{ } \mu\text{M}$         |

Parameters were obtained from the fit of the kinetic model (Fig. 7) to the data shown in Fig. 5B. In addition, a scale-factor was refined that relates autoradiograph readings to the concentration of CckA-ΔTM~P.

\* not refined, set to apparent  $K_d$  obtained by ITC for ADP or AMPPNP (table S2).

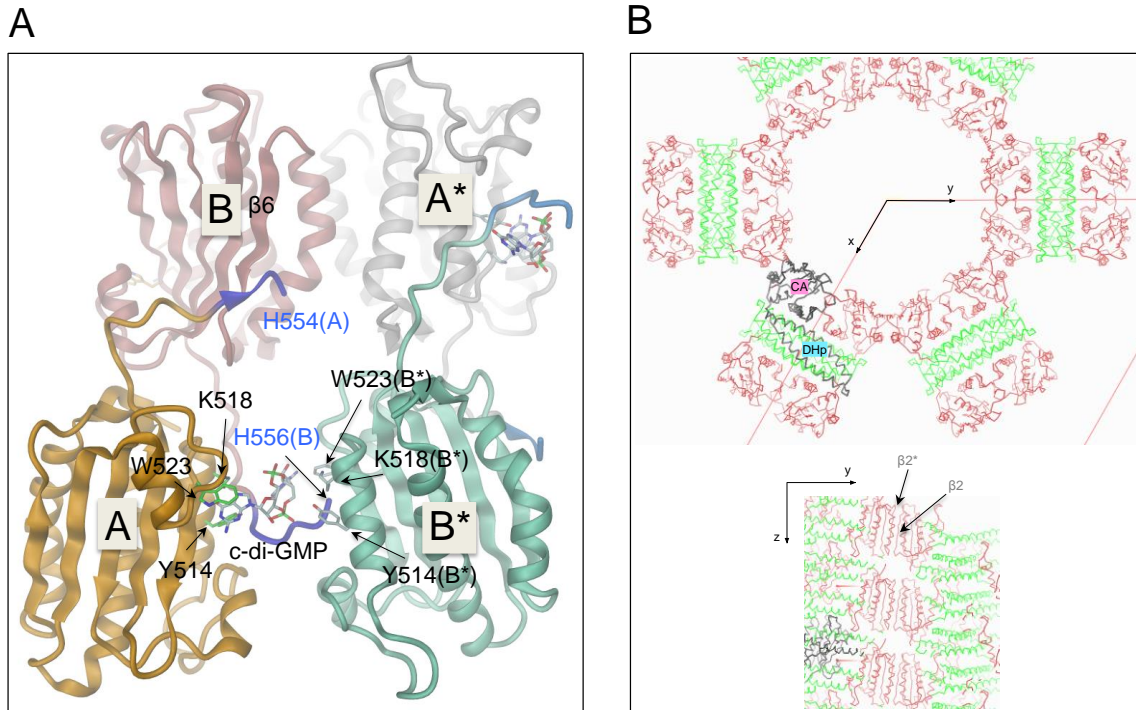

**fig. S1. CckA crystal packings.** (A) Crystal packing of CckA\_CA with two molecules in asymmetric unit (A, B); also shown are two symmetry related molecules (A\*, B\*). The C-terminal His(6)-tails are colored in blue. C-di-GMP is bound to the primary site of molecule A (orange), whereas the primary binding site of B\* (green) is blocked by the His-tail of the symmetry related B chain. The His-tail of A interacts laterally with  $\beta_6$  at the edge of the  $\beta$ -sheet edge of B. (B) Two orthogonal views of the CckA\_DHp-CA crystal packing. The crystal of space-group  $P6_322$  is formed by  $\beta$ -sheet edge-to-edge association ( $\beta_2 / \beta_2^*$ ) of CA domains (red) across crystallographic dyads. In combination with the crystallographic  $6_3$  screw axis, nano-tubes with a diameter of 45 Å are formed in the z-direction. The nano-tubes are held together by DHp domains (green) that form crystallographic dimers.

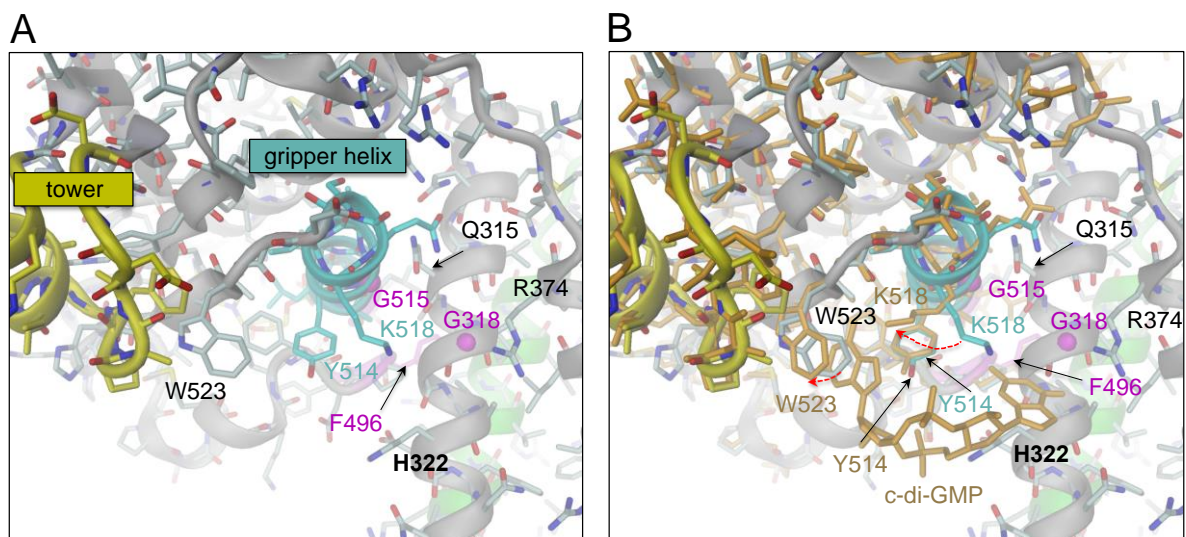

**fig. S2. Detailed view of domain interface of CckA\_DHp-CA and comparison with c-di-GMP-bound CckA\_CA.** Viewing direction same as in Fig. 2. The "gripper" helix (residues 509 - 520) and the tower (456 - 471) are shown in cyan and yellow, respectively. The C $\alpha$  atoms of Gly318 and Gly515 are shown as magenta spheres. **(A)** CckA\_DHp-CA crystal structure. **(B)** Same as **(A)**, but showing, in addition, the crystal structure of CckA\_CA with bound c-di-GMP (all atoms, orange) superimposed. The two major local changes induced by c-di-GMP binding (K518, W523) are indicated by red broken arrows.

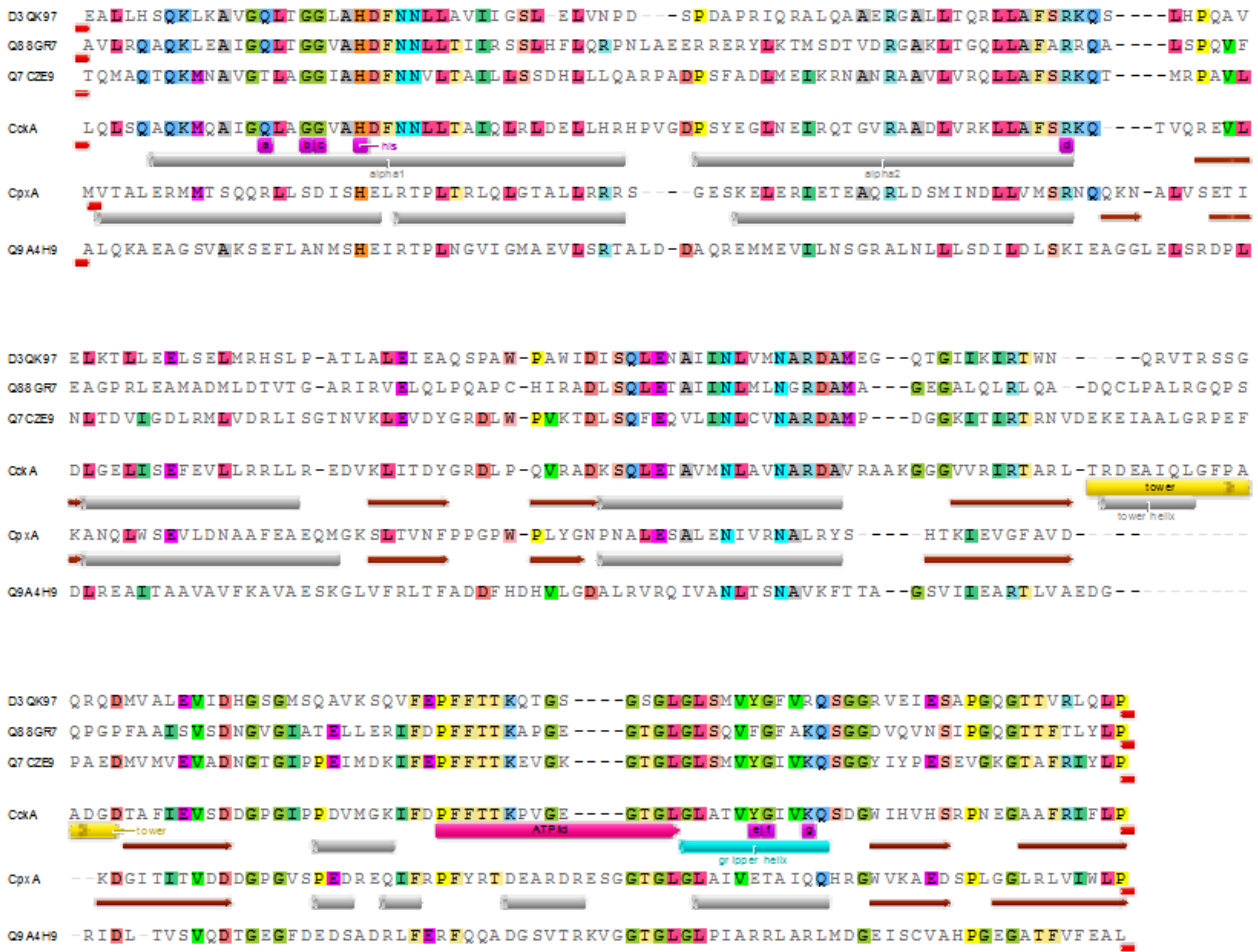

**fig. S3. Sequence alignment between CckA orthologs and paralogs.** CckA orthologs from UPEC *E. coli* (UNIPROT D3QK97), *Pseudomonas putida* (Q88GR7), *Agrobacterium tumefaciens* (Q7CZE9), and CckA from *Caulobacter crescentus* (H7C7G9) are shown at the top. Paralogs CpxA from *E. coli* (P0AE82) and Q9A4H9 from *C. crescentus* are shown at the bottom. Residue numbers refer to CckA. The sequence alignment between CckA and CpxA conforms to the alignment between the crystal structures and secondary structure elements are indicated. Important CckA residues are annotated: **a**, Q315; **b-c**, G318, G319; **d**, R374; **e**, Y514; **f**, G515; **g**, K318. All of these residues are specifically conserved in the orthologous group.

# ADP binding

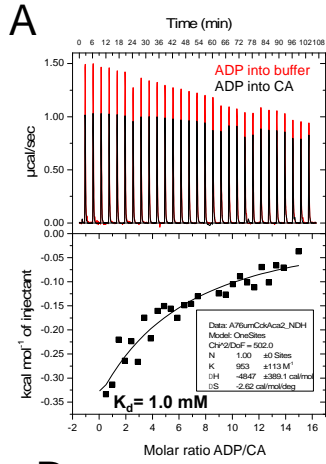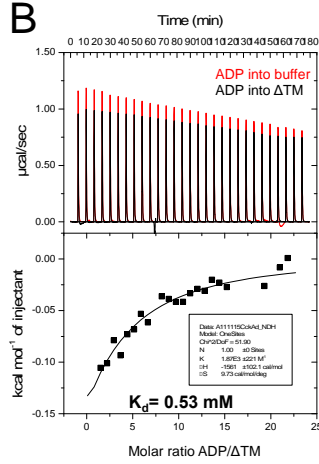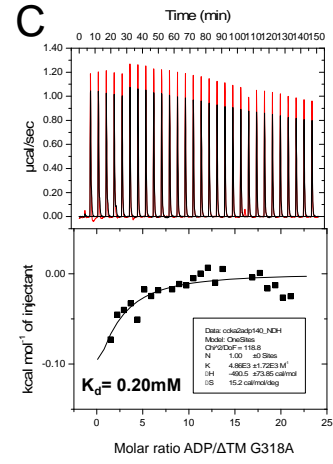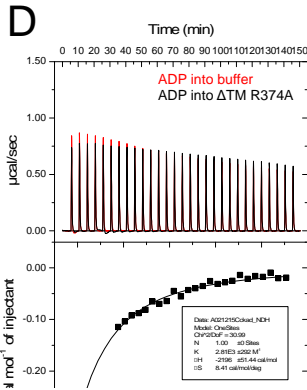

# AMPPNP binding

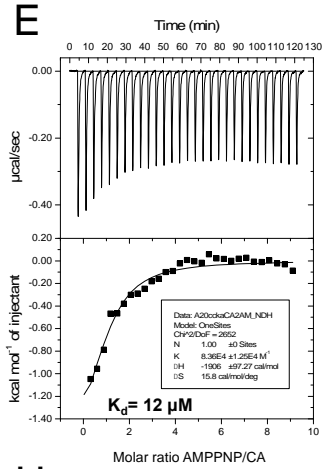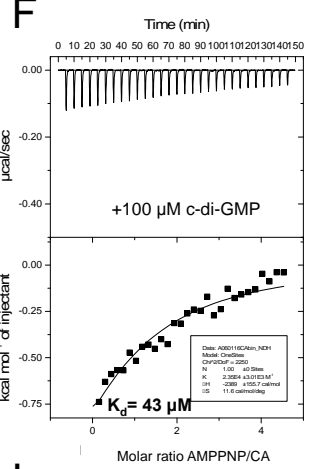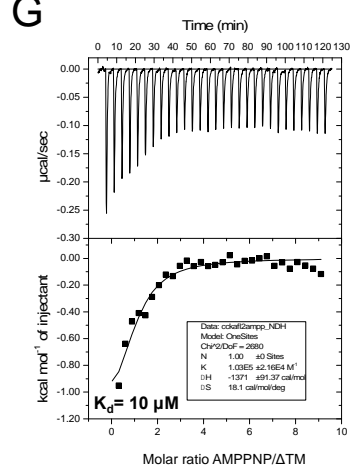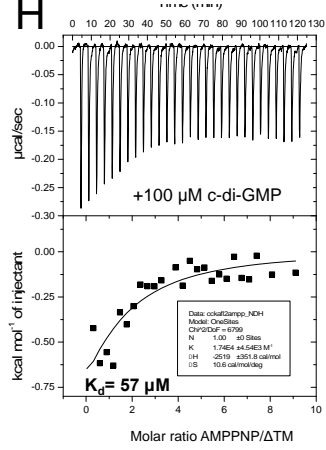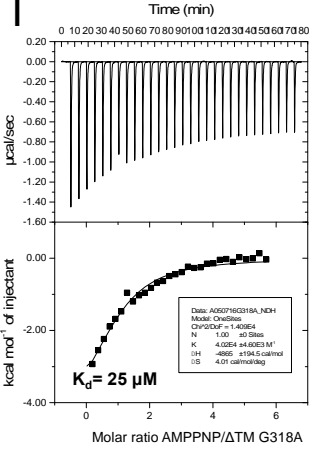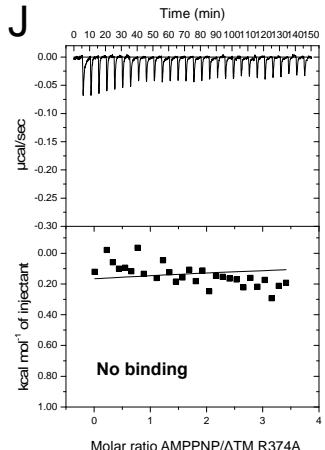



# c-di-GMP binding

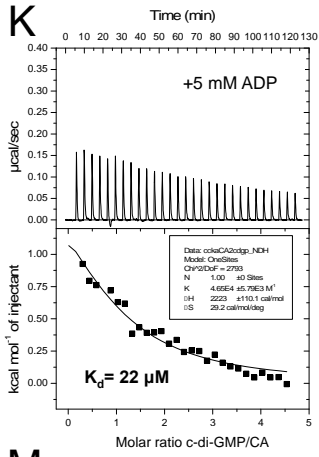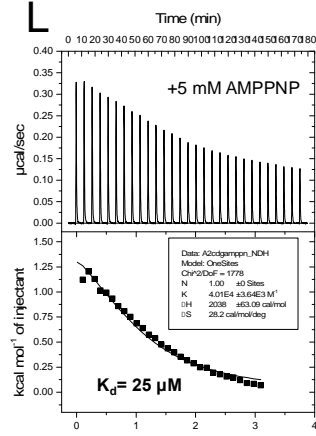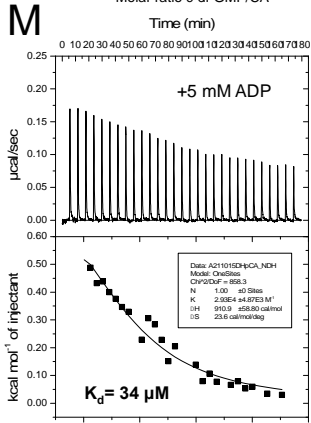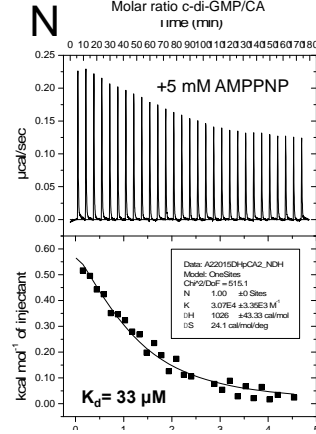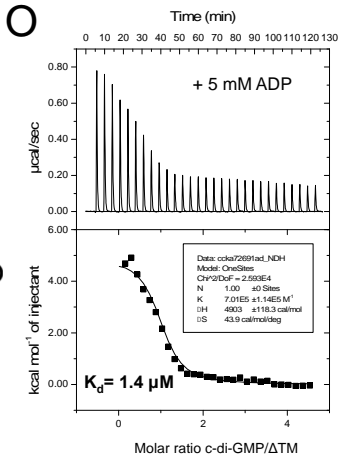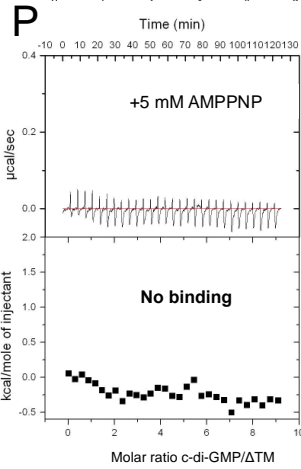

# c-di-GMP binding

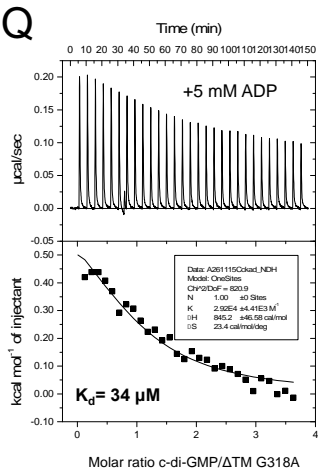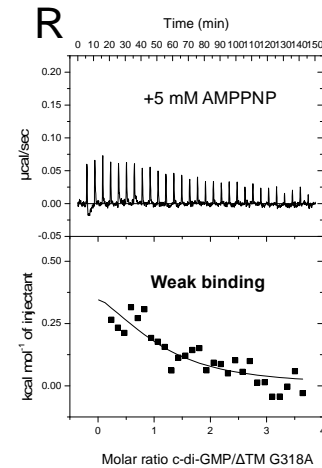

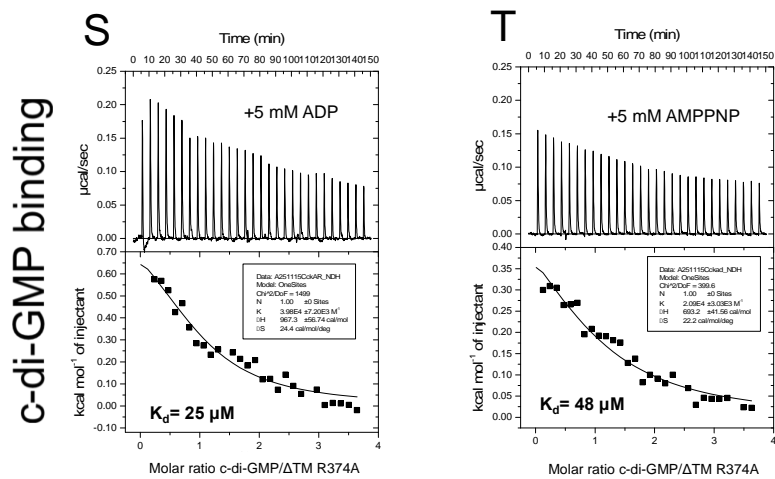

**fig. S4. ITC ligand-binding profiles for several CckA. (A-D), ADP binding.** Data were evaluated taking into account the large heat of dilution (red trace) due to the high amount of ADP in each injection. **(E-J), AMPPNP binding** in absence and presence of c-di-GMP. **(K-T), c-di-GMP binding** in presence of ADP or AMPPNP. Experimental conditions and the resulting thermodynamic parameters are given in table S2.

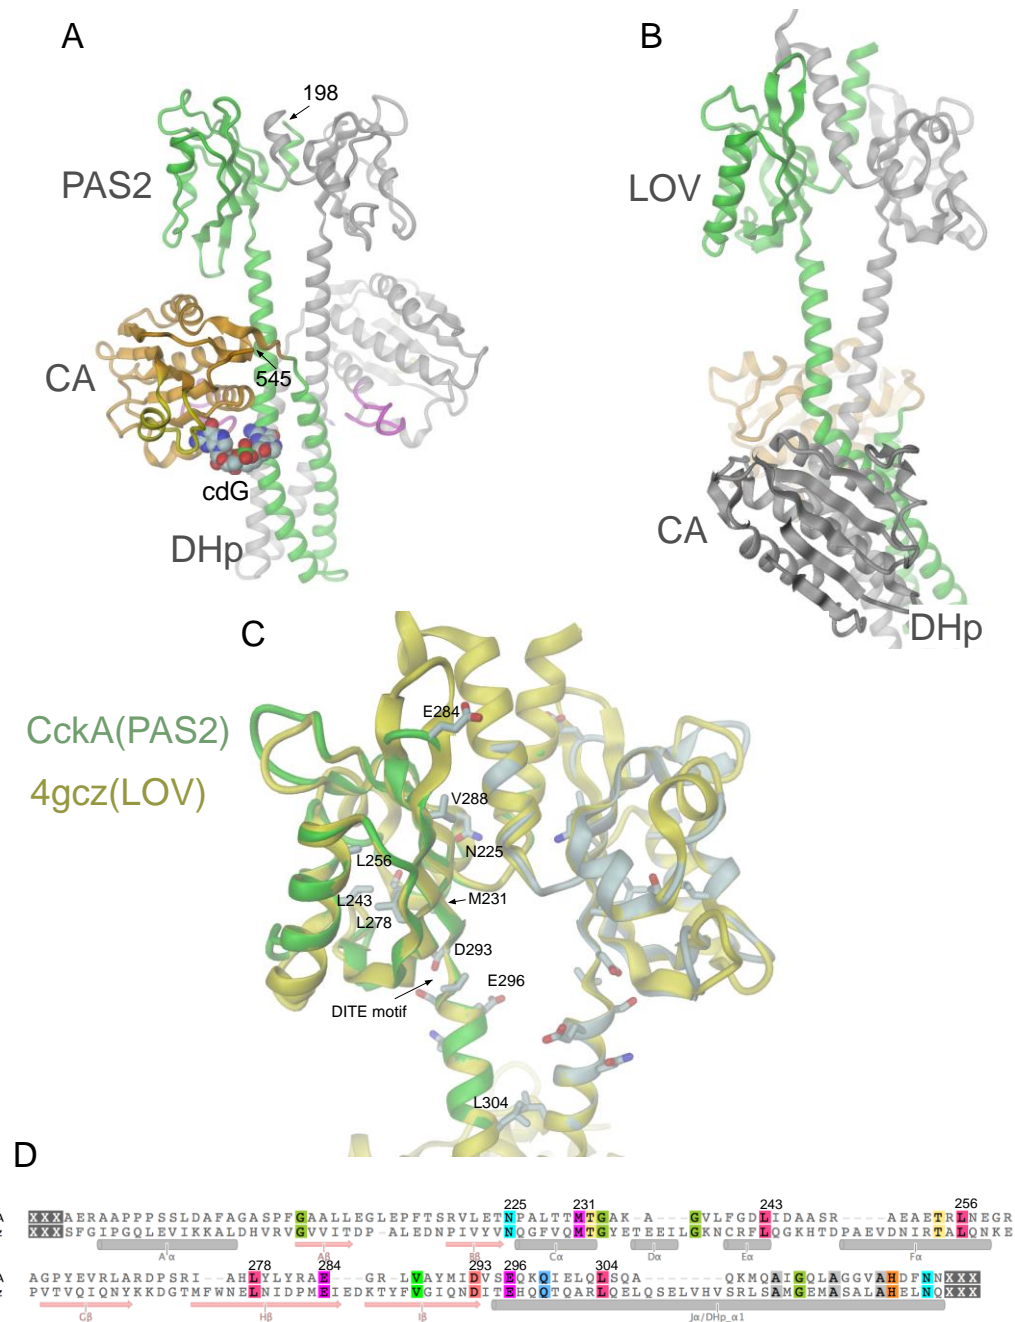

**fig. S5. Structure prediction for PAS2 domain of CckA.** (A) CckA\_DHp-CA structure with joined homology model for the N-terminal PAS2 dimer. The PAS2 homology model was obtained based on PDB entry 4gcz (structure of an engineered LOV-DHp-CA construct based on the LOV domain of YtvA and the DHp-CA domains of FixL (8)) using SwissModel (45) (qmean4 = -3.28). (B) YtvA/FixL template structure (PDB code 4gcz). Orientation such that the N-terminal LOV dimer is in same orientation as the PAS2 dimer in (A). (C) Sequence alignment of CckA\_PAS2-DHp with YtvA(LOV)-FixL(DHp) as obtained by SwissModel and used for homology modeling. Note that the domain linker is shorter by 7 residues in CckA, which is compatible with a coiled-coil dimer shortened by two turns.

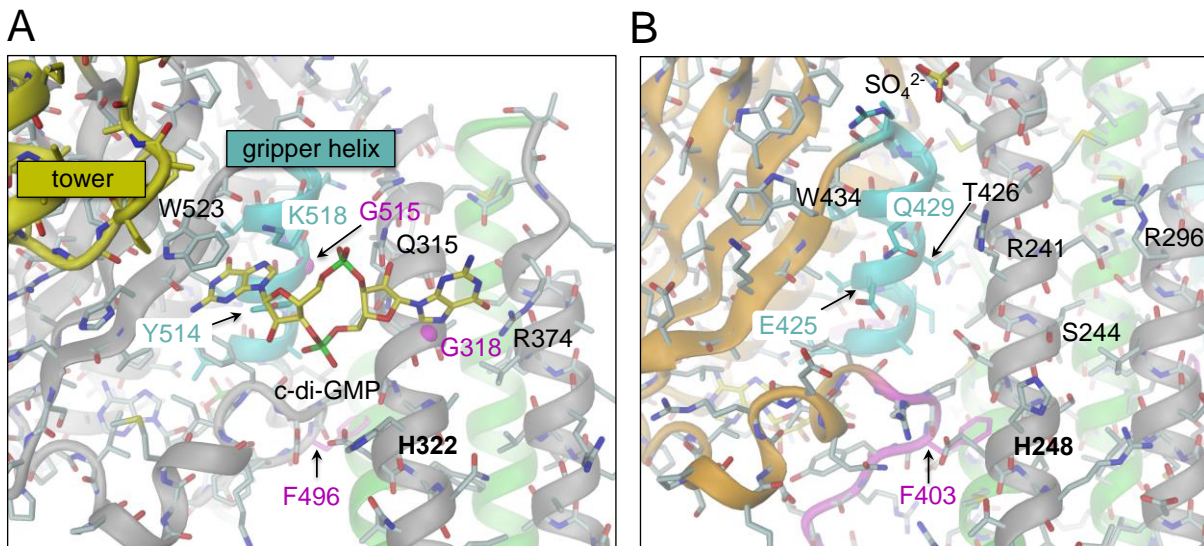

**fig. S6. Proposed model of noncovalent c-di-GMP-mediated cross-linking of the CA with the DHp domain of CckA.** (A) CckA model obtained by superposition of its individual DHp helices and its CA domain onto the CpxA/ADP structure (17). The distal part of the c-di-GMP ligand (right) has been remodeled in extended conformation as observed when bound to the YhaA EAL domain (46). The side-chain conformation of Arg374 has been adjusted to allow interaction with the c-di-GMP ligand. The C $\alpha$  atoms of Gly318 and Gly515 are shown as magenta spheres. (B) Structure of CpxA/ADP in same view, for comparison. Phe403 (shown in magenta) is engaged in the CA–DHp interface, but all residues crucial for c-di-GMP binding in CckA are not conserved.

A

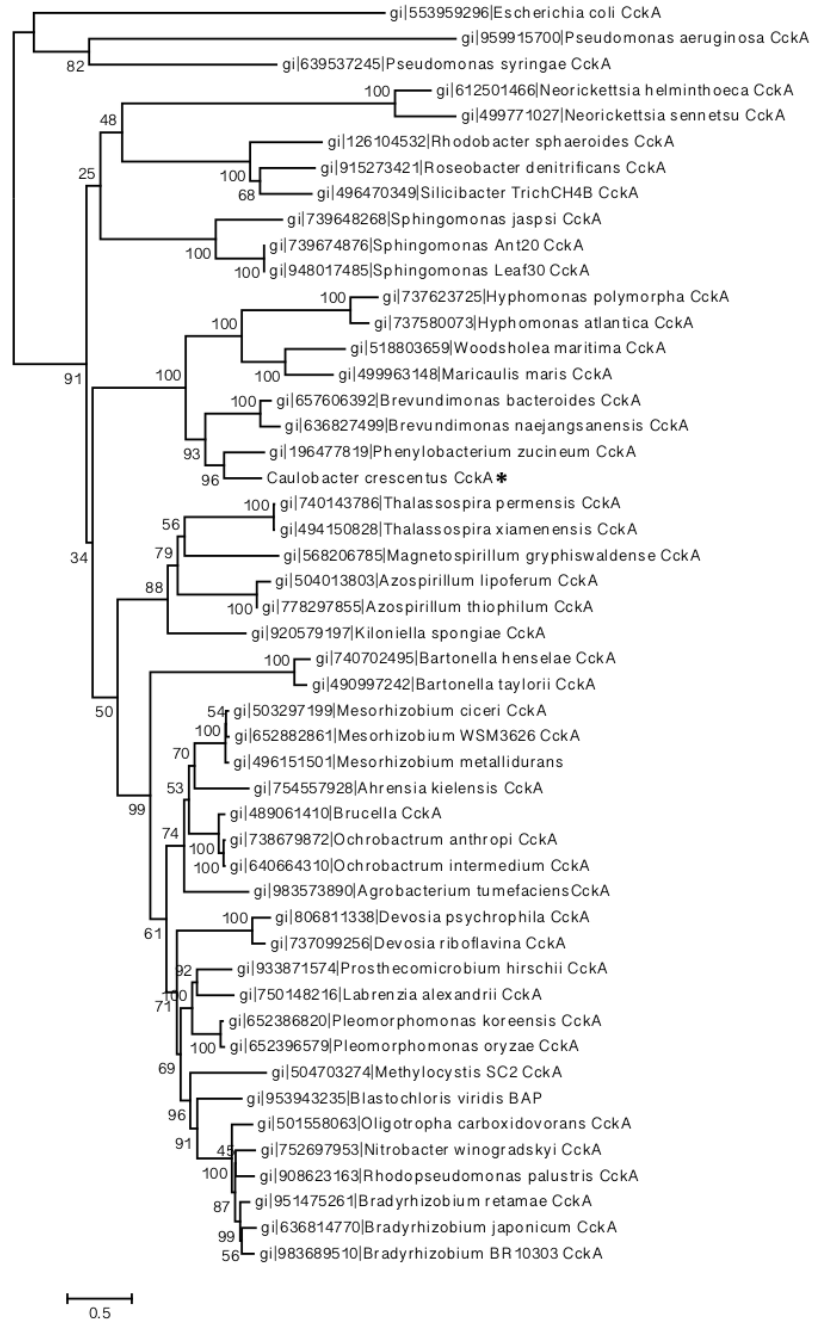



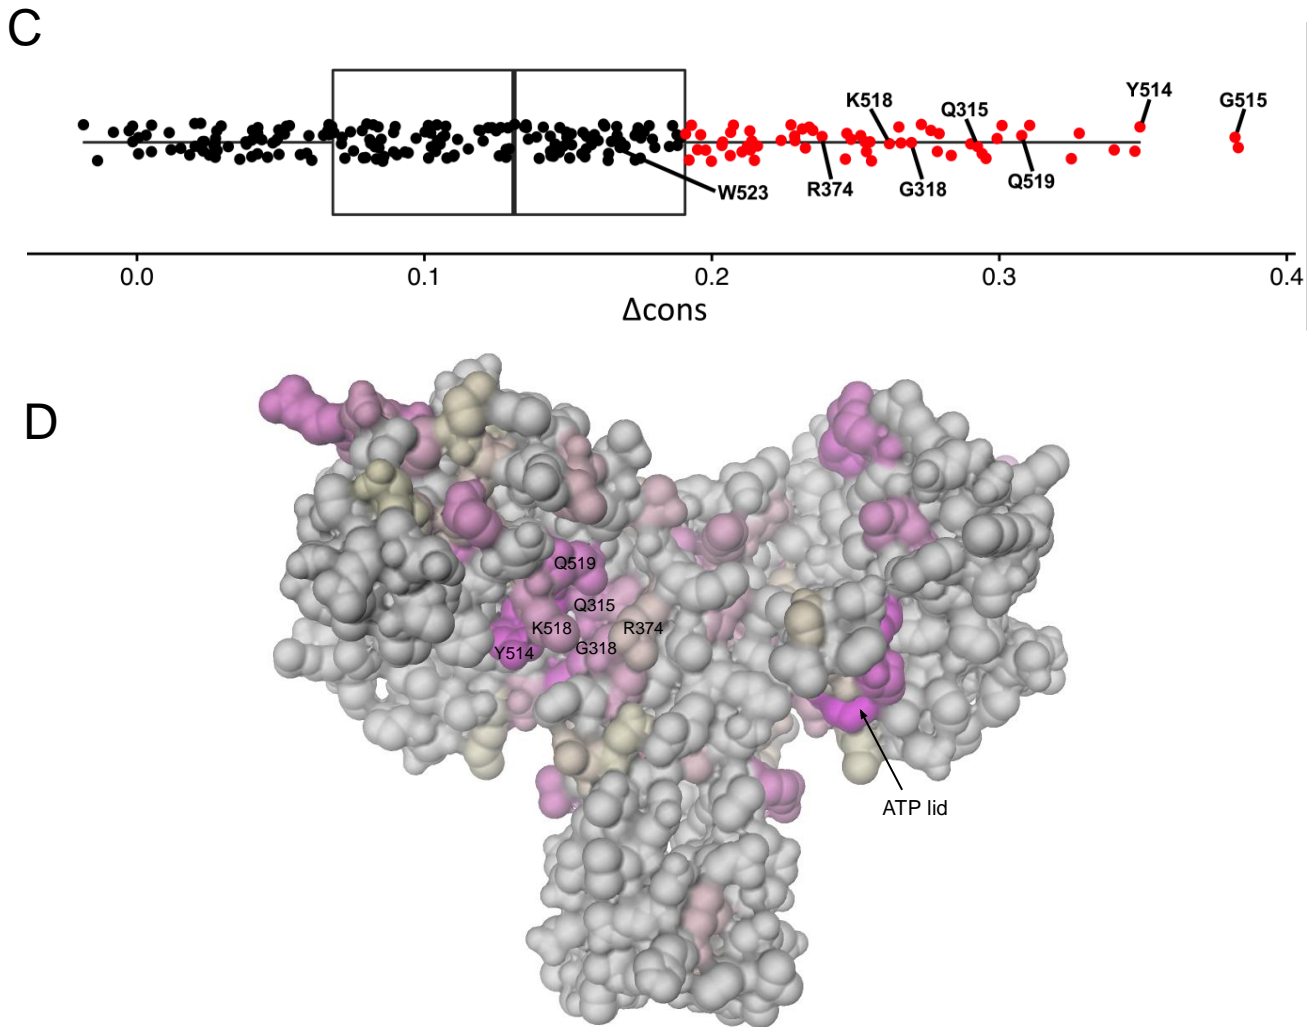

**fig. S7. Consensus tree analysis for CckA orthologs and paralogs.** (A) Bootstrap consensus tree analysis (500 replicates) of CckA orthologs built using the Neighbor-Joining method (47). Distances were computed using the Jones-Taylor-Thornton matrix-based method (48). The percentage of replicate trees in which the associated taxa clustered together in the bootstrap test (500 replicates) are shown next to the branches (49). The rate variation among sites was modeled with a gamma distribution (shape parameter = 1). All ambiguous positions were removed for each sequence pair. Analyses were conducted in MEGA6 (50). (B) Combined consensus tree (500 replicates) of CckA orthologs (black) and paralogs (blue). (C) Boxplot of distribution of CckA  $\Delta$ cons scores. Sites scoring in the upper quartile are shown in red. (D) CckA  $\Delta$ cons scores in the upper quartile mapped onto the CckA structure as a color gradient (yellow to magenta, low to high  $\Delta$ cons; view as in Fig. 4A). Residues defining the c-di-GMP binding site at the DHp/CA interface are labeled.

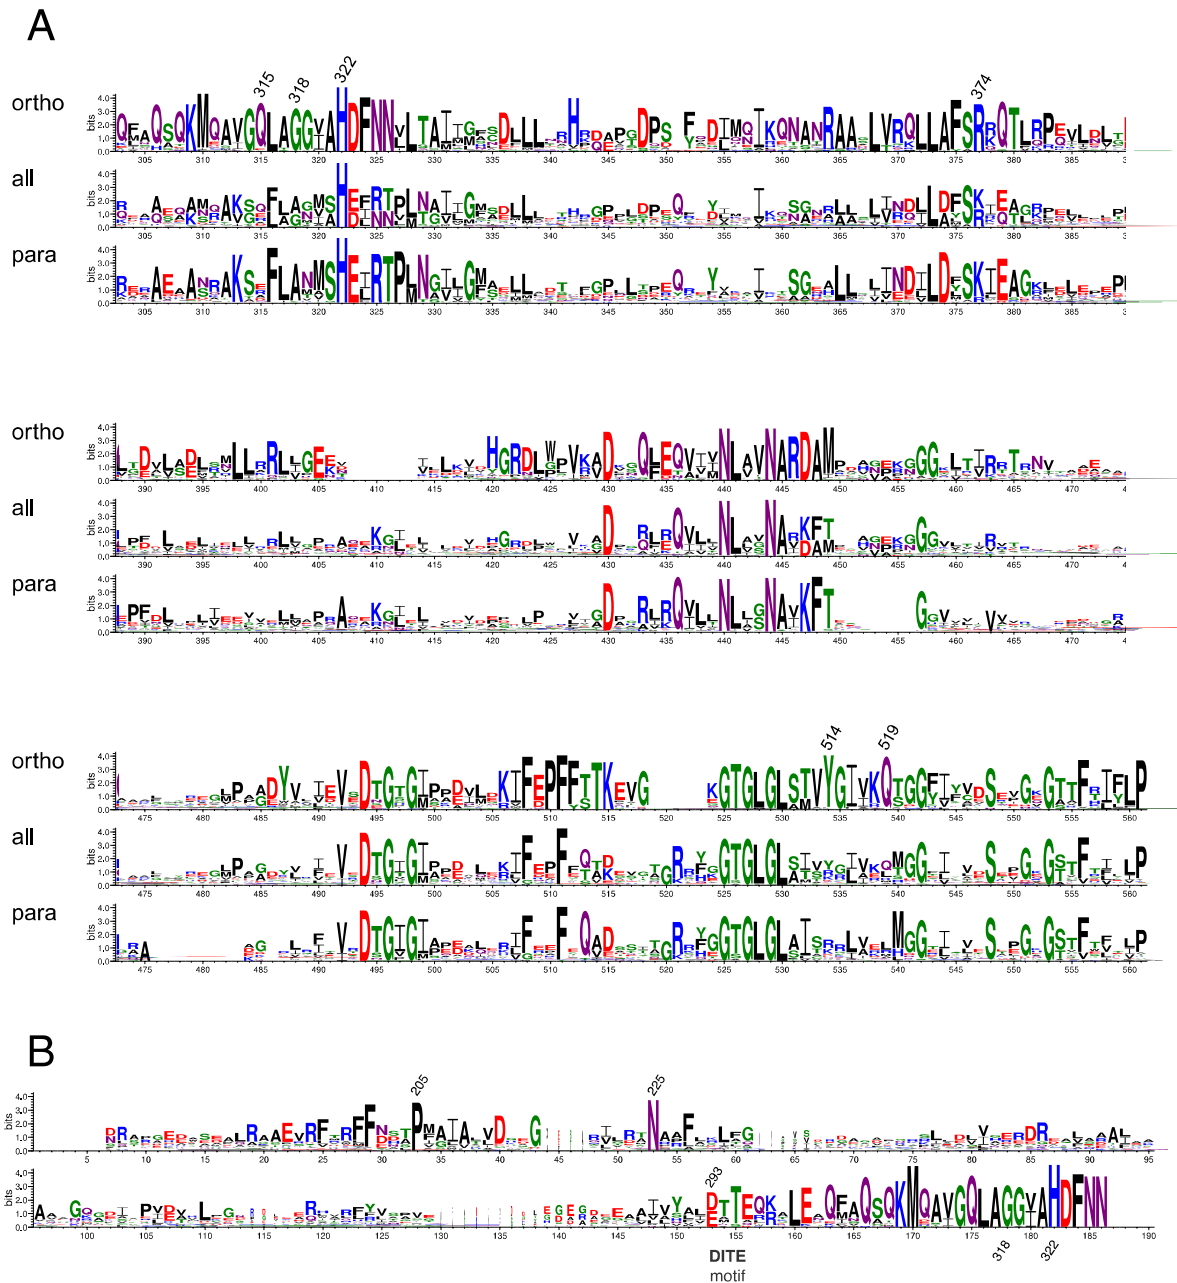

**fig. S8. Residue conservation in CckA orthologs and paralogs.** (A) Sequence logos (51) are shown based on 49 sequences of CckA orthologs (top), 75 sequences of paralogs (bottom) and for both groups together (middle). Latter graph highlights the residues that are essential for general histidine kinase function. See also fig. S7B. Residues specifically conserved (SDPs) in the orthologous CckA group (top) are labeled with their CckA number, otherwise global residue numbering. (B) N-terminal extension of the ortho-group logo towards the proximal PAS domain region, using only the 36 sequences that could be aligned confidently. Note that this region is very variable with the exception of a conserved P and N, and the DITE motif (labeled with CckA residue numbers).
